# Supplementary material for: Alternate-locus aware variant calling in whole genome sequencing
Source: PubMed Central journal article supplement (PMC5155401; doi:10.1186/s13073-016-0383-z), 2016-12-13
Supplement: 13073_2016_383_MOESM1_ESM.pdf [file 13073_2016_383_MOESM1_ESM.pdf]

# Alternate-Locus Aware Variant Calling in Whole Genome Sequencing

Online Supplement

November 21, 2016

## Contents

|                                                                                                           | <b>Page</b> |
|-----------------------------------------------------------------------------------------------------------|-------------|
| <b>Figure S1</b> ALC Region . . . . .                                                                     | 2           |
| <b>Figure S2</b> REGION151 . . . . .                                                                      | 3           |
| <b>Figure S3</b> MHC region . . . . .                                                                     | 4           |
| <b>Figure S4</b> REGION14 . . . . .                                                                       | 5           |
| <b>Figure S5</b> REGION142 . . . . .                                                                      | 6           |
| <b>Figure S6</b> NCBI Alignment for REGION155 . . . . .                                                   | 7           |
| <b>Figure S7</b> Corrected Alignment for REGION155 . . . . .                                              | 8           |
| <b>Figure S8</b> Banded alignment . . . . .                                                               | 9           |
| <b>Figure S9</b> Anchors for alignments . . . . .                                                         | 10          |
| <b>Figure S10</b> First-pass screening for candidate ASDPs . . . . .                                      | 11          |
| <b>Figure S11</b> ASDPex VCF file extensions and modifications . . . . .                                  | 12          |
| <b>Figure S12</b> REGION176 vs. KI270859.1 . . . . .                                                      | 13          |
| <b>Figure S13</b> REGION165 vs. KI270839.1 . . . . .                                                      | 14          |
| <b>Figure S14</b> REGION123 vs. KI270780.1 . . . . .                                                      | 15          |
| <b>Figure S15</b> ZNF66 vs. GL383573.1 . . . . .                                                          | 16          |
| <b>Figure S16</b> REGION42 vs. GL383579.2 . . . . .                                                       | 17          |
| <b>Figure S17</b> REGION112 vs. KI270759.1 . . . . .                                                      | 18          |
| <b>Figure S18</b> REGION112 vs. KI270759.1 . . . . .                                                      | 19          |
| <b>Figure S19</b> REGION108 vs. KI270762.1 . . . . .                                                      | 20          |
| <b>Figure S20</b> SERPIN_REGION_1 vs. KI270845.1 . . . . .                                                | 21          |
| <b>Figure S21</b> ABR vs. KI270910.1 . . . . .                                                            | 22          |
| <b>Figure S22</b> REGION23 vs. GL383552.1 . . . . .                                                       | 23          |
| <b>Figure S23</b> Number of annotated alternate loci per population . . . . .                             | 24          |
| <b>Figure S24</b> Ts/Tv ratio for both genome builds . . . . .                                            | 25          |
| <b>Figure S25</b> ASDP-associated variants in 121 in-house genomes . . . . .                              | 26          |
| <b>Figure S26</b> SAM format for read with supplementary alignment . . . . .                              | 27          |
| <b>Table S1</b> Fields of “alt_scaffold_placement.txt” . . . . .                                          | 28          |
| <b>Table S2</b> Size distribution of the alternate scaffolds of GRCh38.p2 . . . . .                       | 29          |
| <b>Table S3</b> Sequence ontology categories of ASDPs . . . . .                                           | 30          |
| <b>Table S4</b> GWAS Hits that Overlap with ASDPs . . . . .                                               | 31          |
| <b>Table S5</b> High-impact Alignable Scaffold-Discrepant Positions (ASDPs) not listed in dbSNP . . . . . | 39          |
| <b>Algorithm S1</b> Determine candidate seed . . . . .                                                    | 40          |
| <b>Algorithm S2</b> ASDPex . . . . .                                                                      | 41          |

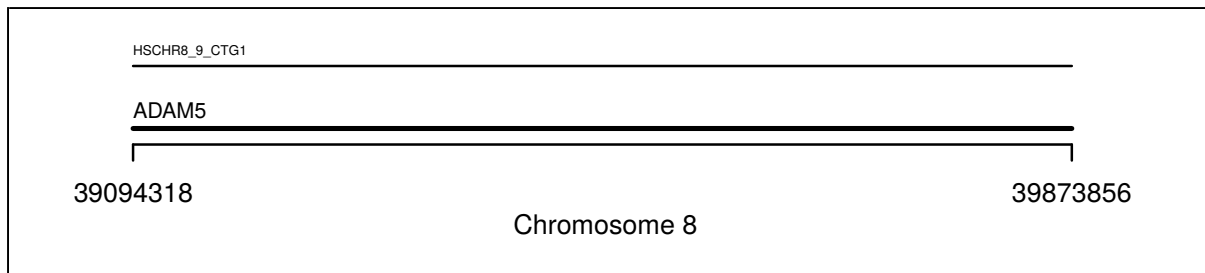

| Field          | Value            |
|----------------|------------------|
| alt_asm_name   | ALT_REF_LOCI_1   |
| prim_asm_name  | Primary Assembly |
| alt_scaf_name  | HSCR8_9_CTG1     |
| alt_scaf_acc   | NT_187577.1      |
| parent_type    | CHROMOSOME       |
| parent_name    | 8                |
| parent_acc     | NC_000008.11     |
| region_name    | ADAM5            |
| ori            | +                |
| alt_scaf_start | 1                |
| alt_scaf_stop  | 624492           |
| parent_start   | 39094318         |
| parent_stop    | 39873856         |
| alt_start_tail | 0                |
| alt_stop_tail  | 0                |

**Figure S1: ALC Region.** A single alternate locus defines start and stop positions of the ALC region. In this example, the region called ADAM5 is located on chromosome 8 (NC\_000008.11) at positions 39,094,318–39,873,856 (corresponding to 779,539 nucleotides). The alternate scaffold comprises 624,492 nucleotides. The table shows the values of the `alt_scaffold_placement.txt` file that describe the alternate scaffold. See **Table S1** for an explanation of the fields.

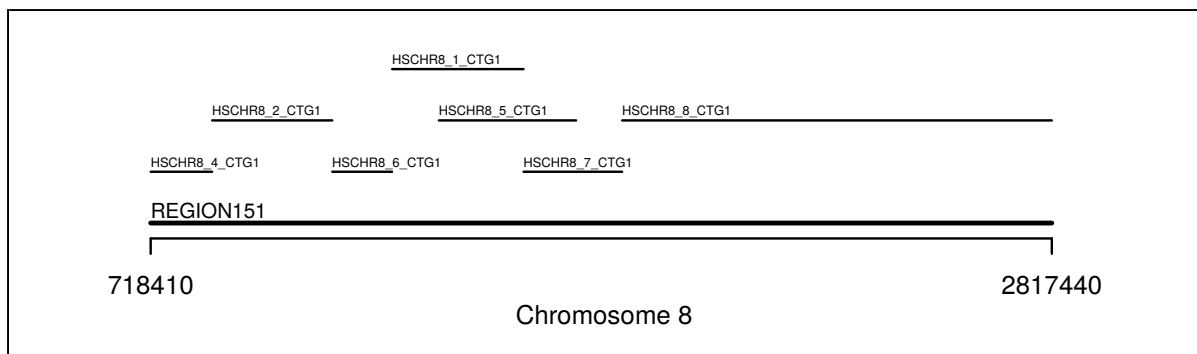

| Field          | Value            |
|----------------|------------------|
| alt_asm_name   | ALT_REF_LOCI_1   |
| prim_asm_name  | Primary Assembly |
| alt_scaf_name  | HSCHR8_4_CTG1    |
| alt_scaf_acc   | NT_187572.1      |
| parent_type    | CHROMOSOME       |
| parent_name    | 8                |
| parent_acc     | NC_000008.11     |
| region_name    | REGION151        |
| ori            | +                |
| alt_scaf_start | 1                |
| alt_scaf_stop  | 145606           |
| parent_start   | 718410           |
| parent_stop    | 861641           |
| alt_start_tail | 0                |
| alt_stop_tail  | 0                |

**Figure S2: REGION151.** REGION151 is located on chromosome 11 (NC\_000008.11) at positions 718,410–2,817,440 (corresponding to 2,099,031 nucleotides). Multiple alternate scaffolds can be contained in this region. The table shows REGION151, which corresponds to positions 718,410–861,641 (143,232 nucleotides) on chromosome 8, and comprises a total of 145,606 nucleotides. Each of the seven alternative scaffolds was aligned separately, for a total of seven different alignments. The regions not covered by the alignment are assumed to be identical with the reference sequence. See **Table S1** for an explanation of the fields.

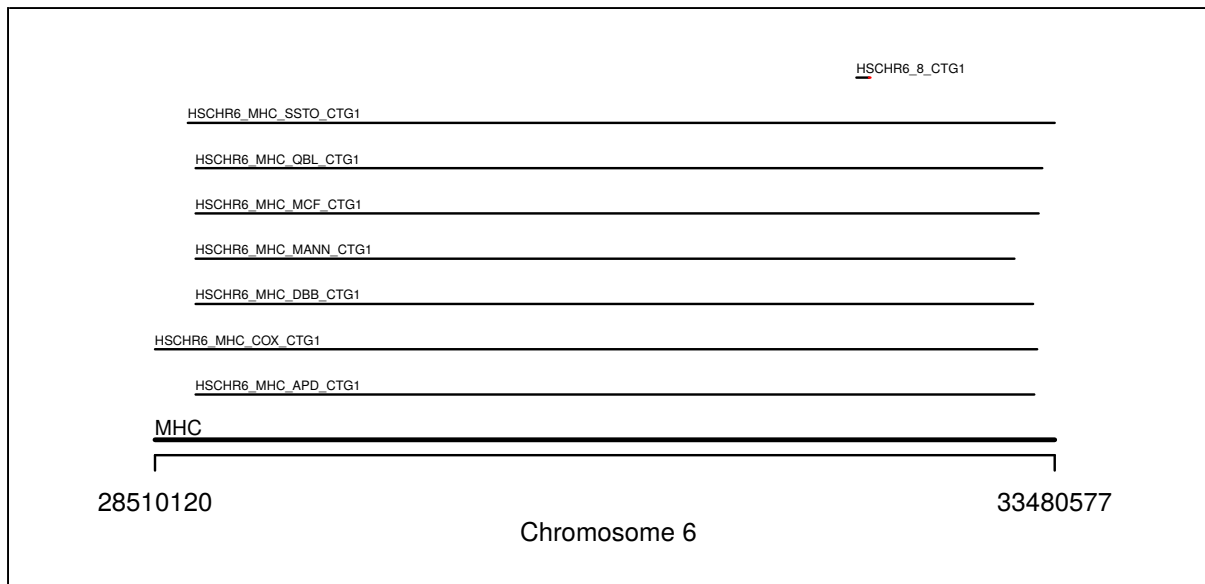

| Field          | Value               |
|----------------|---------------------|
| alt_asm_name   | ALT_REF_LOCI_1      |
| prim_asm_name  | Primary Assembly    |
| alt_scaf_name  | HSCHR6_MHC_APD_CTG1 |
| alt_scaf_acc   | NT_167244.2         |
| parent_type    | CHROMOSOME          |
| parent_name    | 6                   |
| parent_acc     | NC_000006.12        |
| region_name    | MHC                 |
| ori            | +                   |
| alt_scaf_start | 1                   |
| alt_scaf_stop  | 4672374             |
| parent_start   | 28734408            |
| parent_stop    | 33367716            |
| alt_start_tail | 0                   |
| alt_stop_tail  | 0                   |

**Figure S3: MHC.** The MHC region is located on chromosome 6 (NC\_000006.12) at positions 28,510,120–33,480,577 (corresponding to 4,970,458 nucleotides). The table shows HSCHR6\_MHC\_APD\_CTG1, which comprises 4,672,374 nucleotides. See **Table S1** for an explanation of the fields.

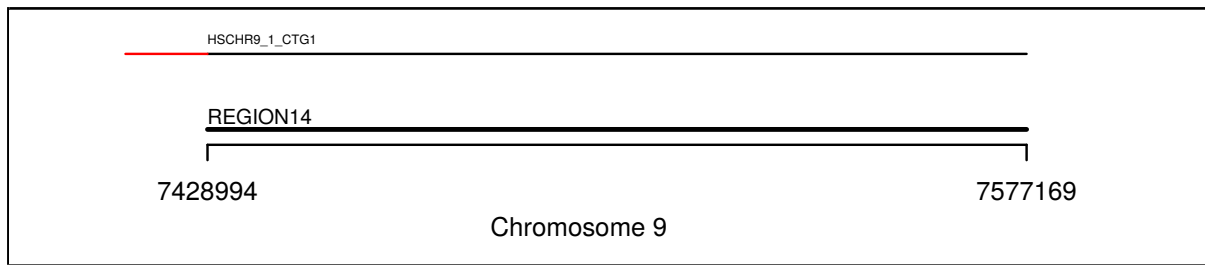

| Field          | Value            |
|----------------|------------------|
| alt_asm_name   | ALT_REF_LOCI_1   |
| prim_asm_name  | Primary Assembly |
| alt_scaf_name  | HSCHR9_1_CTG1    |
| alt_scaf_acc   | NW_003315928.1   |
| parent_type    | CHROMOSOME       |
| parent_name    | 9                |
| parent_acc     | NC_000009.12     |
| region_name    | REGION14         |
| ori            | +                |
| alt_scaf_start | 14845            |
| alt_scaf_stop  | 162988           |
| parent_start   | 7428994          |
| parent_stop    | 7577169          |
| alt_start_tail | 14844            |
| alt_stop_tail  | 0                |

**Figure S4: REGION14.** REGION14 is located on chromosome 9 (NC\_000009.12) at positions 7,428,994–7,577,169 (corresponding to 148,176 nucleotides). The segment shown in red is an insertion. See **Table S1** for an explanation of the fields.

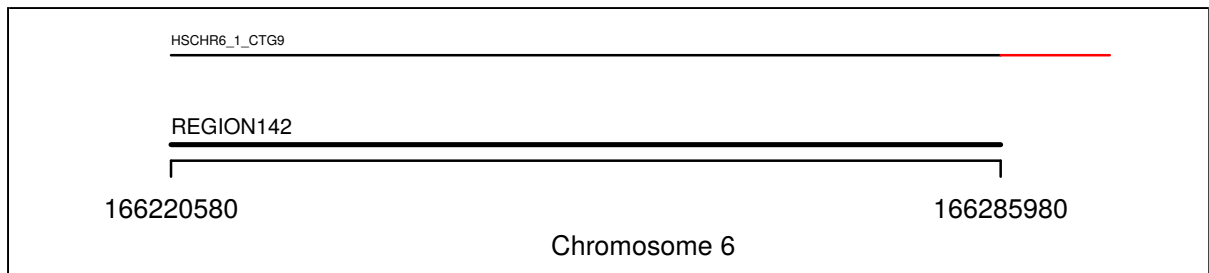

| Field          | Value            |
|----------------|------------------|
| alt_asm_name   | ALT_REF_LOCI_1   |
| prim_asm_name  | Primary Assembly |
| alt_scaf_name  | HSCR6_1_CTG9     |
| alt_scaf_acc   | NT_187557.1      |
| parent_type    | CHROMOSOME       |
| parent_name    | 6                |
| parent_acc     | NC_000006.12     |
| region_name    | REGION142        |
| ori            | +                |
| alt_scaf_start | 1                |
| alt_scaf_stop  | 66404            |
| parent_start   | 166220580        |
| parent_stop    | 166285980        |
| alt_start_tail | 0                |
| alt_stop_tail  | 8601             |

**Figure S5: REGION142.** REGION142 is located on chromosome 6 (NC\_000006.12) at positions 166,220,580–166,285,980 (corresponding to 65,401 nucleotides). The segment shown in red is an insertion. See **Table S1** for an explanation of the fields.







A

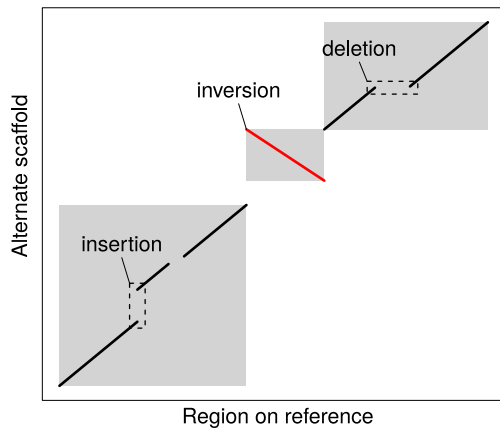

B

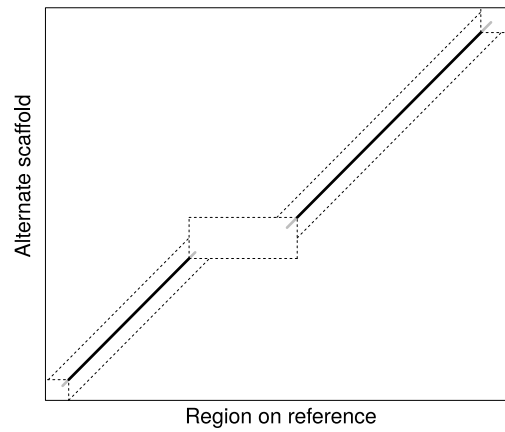

**Figure S8: (A) Banded Alignment.** M (matching) blocks derived from the NCBI alignment are shown as black and red lines. There is a large inversion in the middle of the alignment (red), and thus the whole alignment is divided into three blocks (in gray) that were considered for the banded chain alignment. In the representation of the alignment in the GFF file, the inversion is encoded as a deletion of the original sequence together with an insertion of the inverted sequence. **(B) Determination of seeds for banded-chain alignment.** The figure shows an excerpt of the alignment in Panel A showing the third matching block/band. The matching (M) blocks of the NCBI alignments are shown as black bars with gray ends. The gray ends are clipped off according to Algorithm **S1**, and the remaining black bars represent the seeds used for the banded-chain<sup>2</sup> alignment. The regions analyzed with the banded alignment are shown as dotted lines.

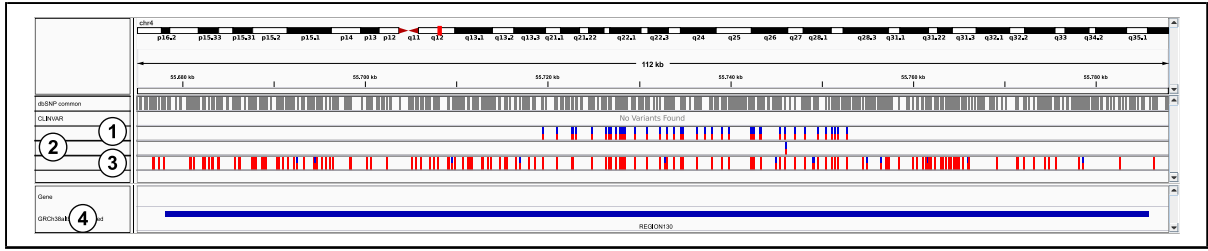

**Figure S9: Anchors for alignments** The alignments between regions and alternate loci begin with identical anchors, such that the beginning and end portions of the alignments are identical. No ASDPs occur in these regions. Therefore, the analysis described in Algorithm **S2** is limited to the alignment region and called variants ③ located from the first to the last ASDP in any given region. The Figure shows an IGV screenshot of ④ REGION130 (chr4:55,678,095-55,785,754). The ASDP-containing portion ① & ② of the region comprises chr4:55,719,527-55,752,683.

# A

```
69100      .   :   .   :   .   :   .   :   .   :   .   :
          TTTTGGTAATAGTGTAGGGACCAGATTGCTGGTGGGAAAATTGGGGAAGG
          |||
          TTTTGGTAATAGTGTAGGGACGAGATTGCTGGTGGGAAAATTGGGGAAGG

69150      .   :   .   :   .   :   .   :   .   :   .   :
          AGGAATCAAATTTTAAGAGACTGTTCTAGTAATCAGGGTGAAAAC TTAGA
          |||
          AGGAATCA---TTTAAGAGACTGTTCTAGTAATCAGGGTGAAAAC TTATA
```

# B

| #CHROM | POS      | ID | REF  | ALT | QUAL | FILTER | INFO                                     | FORMAT | SAMPLE |
|--------|----------|----|------|-----|------|--------|------------------------------------------|--------|--------|
| chr8   | 39163439 | .  | C    | G   | 40   | PASS   | AL=chr8_KI270822v1_alt;RE=ADAM5;RP=69121 | GT     | 0 1    |
| chr8   | 39163475 | .  | AAAT | A   | 40   | PASS   | AL=chr8_KI270822v1_alt;RE=ADAM5;RP=69158 | GT     | 0 1    |
| chr8   | 39163516 | .  | G    | T   | 40   | PASS   | AL=chr8_KI270822v1_alt;RE=ADAM5;RP=69198 | GT     | 0 1    |

**Figure S10:** Representation of ASDP-associated variants in the VCF file used by ASDPex to record ASDPs. **(A)** The alignment displays single-nucleotide mismatches at position 69,122 and 69,199 and a three-nucleotide deletion in the scaffold from 69,159–69,161. **(B)** An excerpt of the VCF file representing the variants in Panel A. ASDPex stores the fields AL (alternate locus), here `chr8.KI270822v1_alt`, RE (region), here `ADAM5`, and RP (region position) in the `INFO` column.

```

...
##FILTER=<ID=ASDP,Description="Filtered due to a more likely alternative scaffold">
##INFO=<ID=ALTGENOTYPE,Number=A,Type=String,Description="most likely alternate scaffold replacement
genotype">
##INFO=<ID=ALTLOCUS,Number=A,Type=String,Description="most likely alternate scaffold id replacement">
...
#CHROM POS ID REF ALT QUAL FILTER INFO FORMAT SAMPLE
chr1 72126 . G C 1539.99 ASDP ALTGENOTYPE=HOM_VAR;ALTLOCUS=chr1_KI270760v1_alt;... GT 1/1
...
chr2 861114 . C T 620.70 ASDP ALTGENOTYPE=HET;ALTLOCUS=chr2_GL383522v1_alt;... GT 0/1

```

**Figure S11: Modifications to the VCF files after annotation with ASDPex.** At the top the new descriptive header lines are shown, defining the new additional flags for FILTER and INFO in the VCF entries. In addition two VCF entries annotated as ASDP-associated-variants are shown. The first is a homozygous variant of a region also called as probable homozygous alternate locus. The second a heterozygous ASDP-associated-variant in a heterozygous annotated region.

A

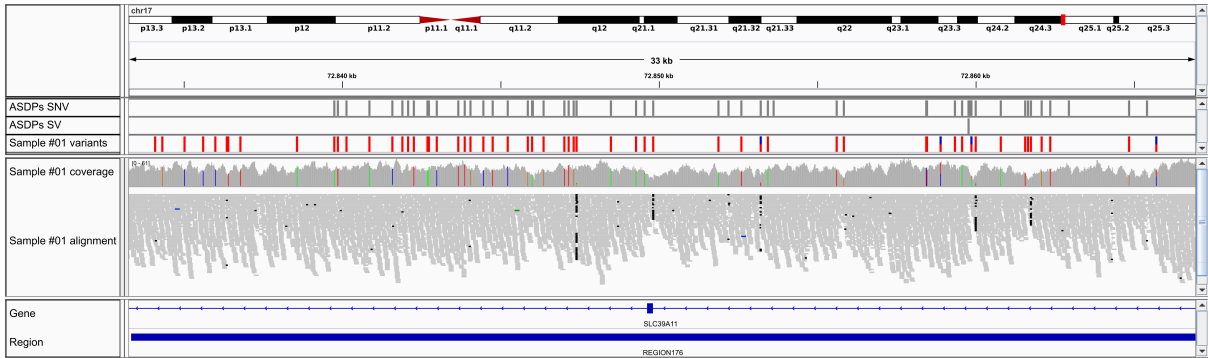

B

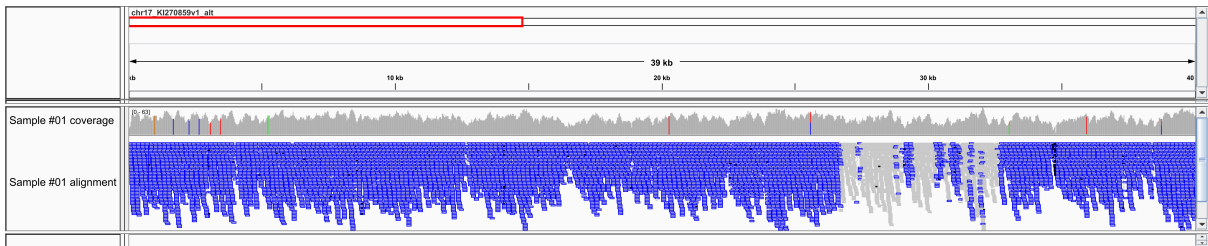

**Figure S12: REGION176 vs. KI270859.1.** (A) Sample #01 shows numerous homozygous ASDP-associated variants in region REGION176 (72,833,239-72,866,965 on chromosome 17). (B) The corresponding region on the alternate locus KI270859.1 displays many fewer discrepancies between aligned reads and ALT-HAP. One can infer that sample #01 is homozygous for KI270859.1.

A

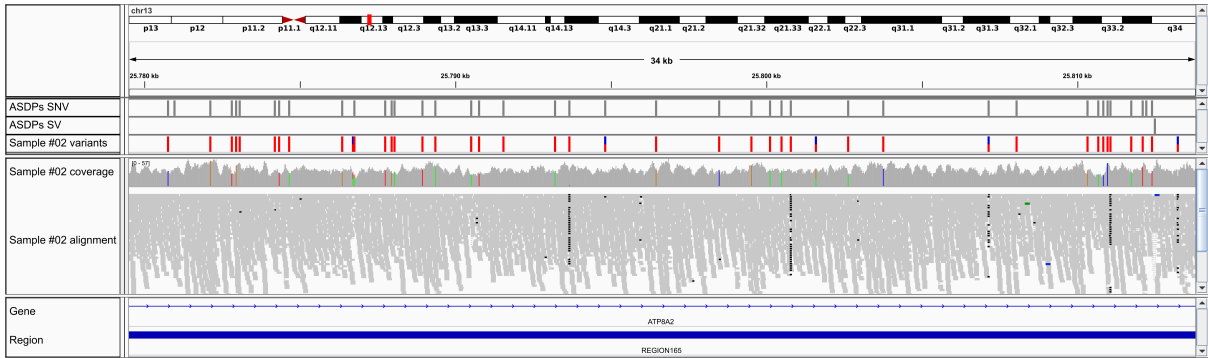

B

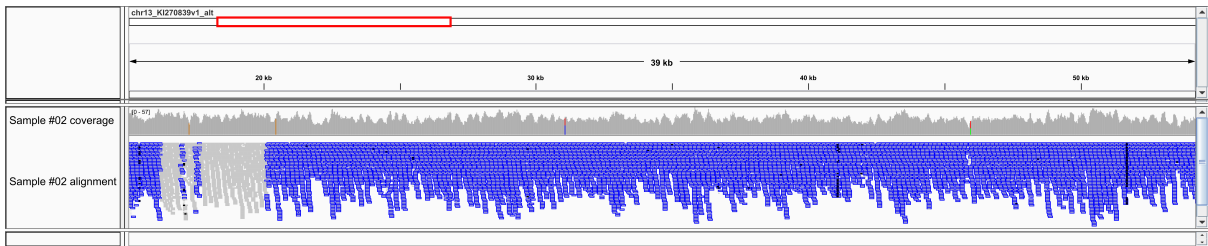

**Figure S13: REGION165 vs. KI270839.1.** (A) Sample #02 shows numerous homozygous ASDP-associated variants in REGION165 (25,779,488-25,813,821 on chromosome 13) (B) The corresponding region on the alternate locus KI270839.1 displays many fewer discrepancies between aligned reads and ALT-HAP. One can infer that sample #02 is homozygous for KI270839.1.

A

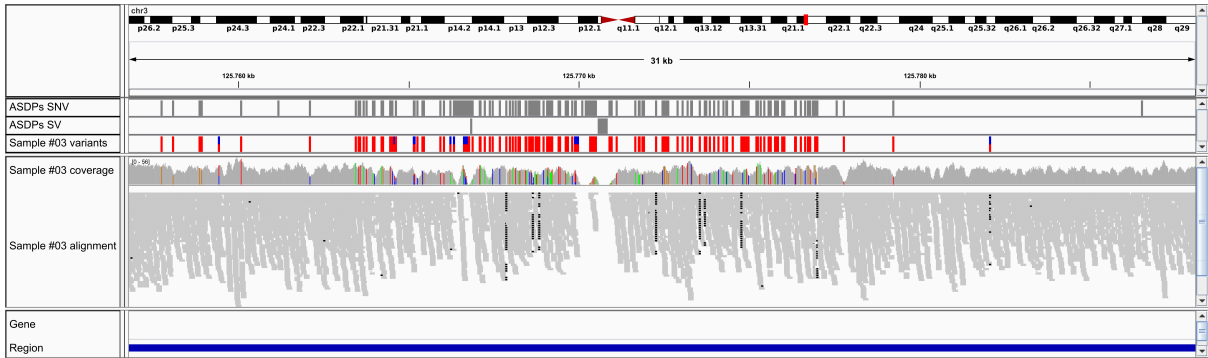

B

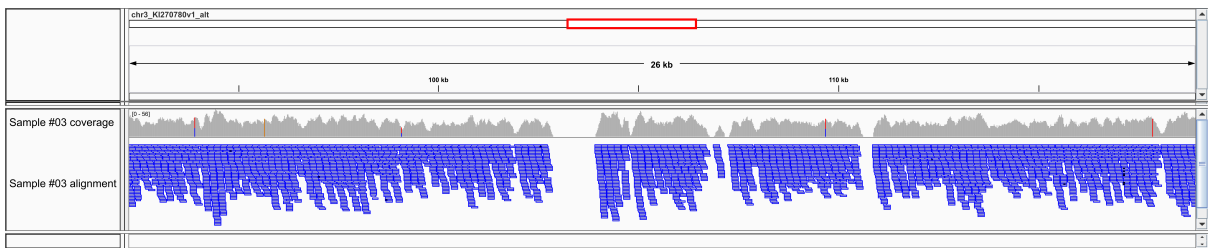

**Figure S14: REGION123 vs. KI270780.1.** (A) Sample #03 shows numerous homozygous ASDP-associated variants in REGION123 (125,756,772-125,788,115 on chromosome 3) (B) The corresponding region on the alternate locus KI270780.1 displays many fewer discrepancies between aligned reads and ALT-HAP. One can infer that sample #03 is homozygous for KI270780.1.

A

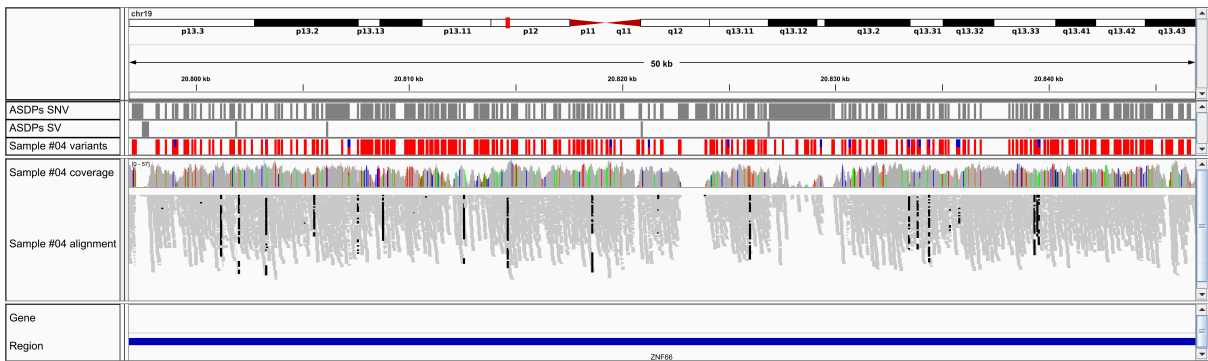

B

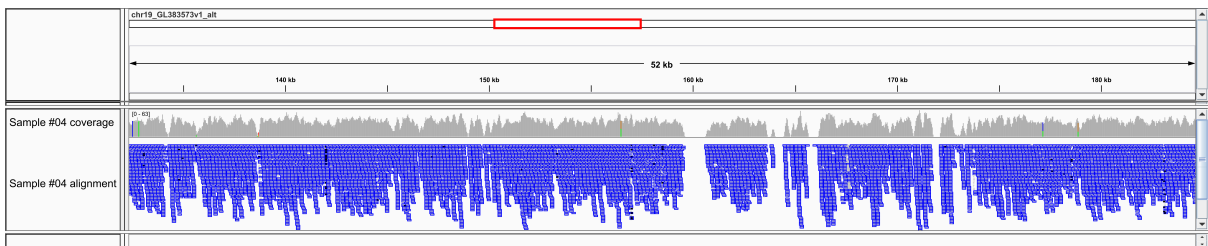

**Figure S15: ZNF66 vs. GL383573.1.** (A) Sample #04 shows numerous homozygous ASDP-associated variants in ZNF66 (20,796,825-20,846,912 on chromosome 19) (B) The corresponding region on the alternate locus GL383573.1 displays many fewer discrepancies between aligned reads and ALT-HAP. One can infer that sample #04 is homozygous for GL383573.1.



# A

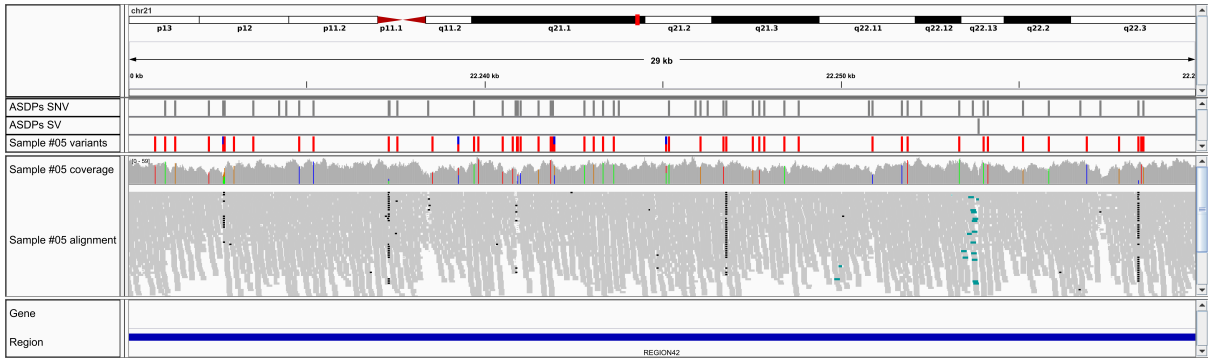

# B

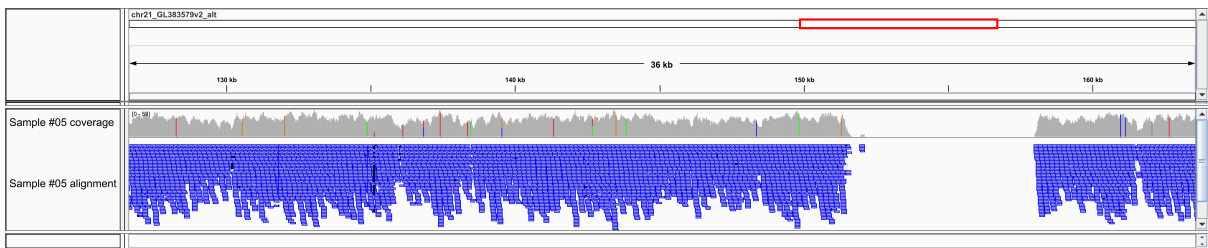

**Figure S16: REGION42 vs. GL383579.2.** (A) Sample #05 shows numerous homozygous ASDP-associated variants in REGION42 (22,229,996-22,259,971 on chromosome 21) (B) The corresponding region on the alternate locus GL383579.2 displays many fewer discrepancies between aligned reads and ALT-HAP. One can infer that sample #05 is homozygous for GL383579.2.

A

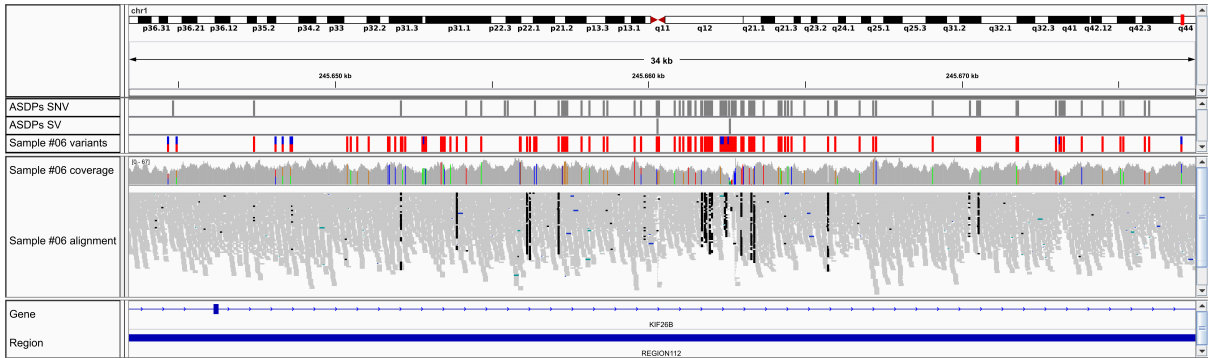

B

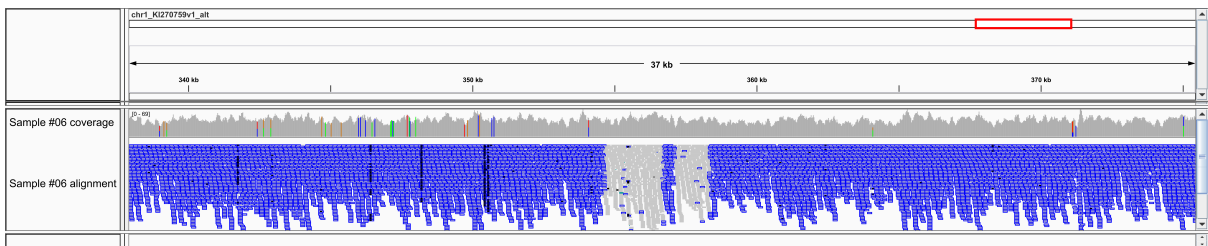

**Figure S17: REGION112 vs. KI270759.1.** (A) Sample #06 shows numerous homozygous ASDP-associated variants in REGION112 (245,643,406-245,677,474 on chromosome 1) (B) The corresponding region on the alternate locus KI270759.1 displays many fewer discrepancies between aligned reads and ALT-HAP. One can infer that sample #06 is homozygous for KI270759.1.

A

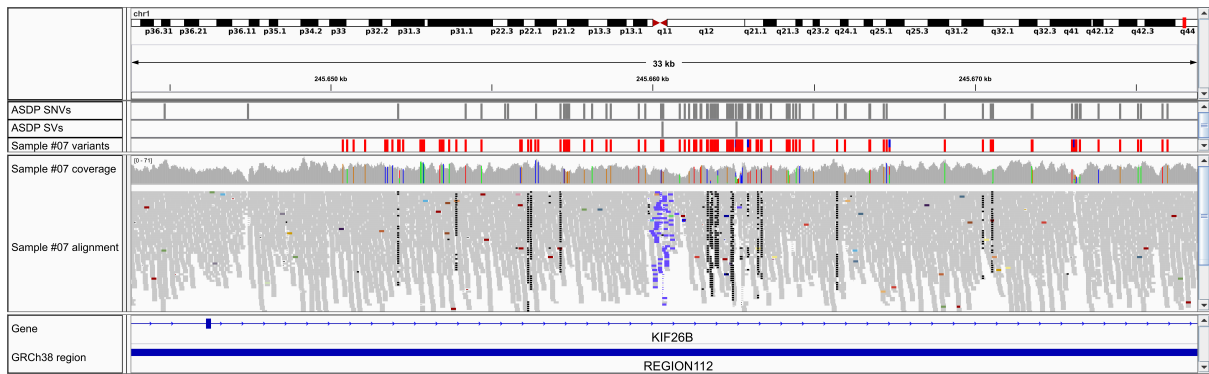

B

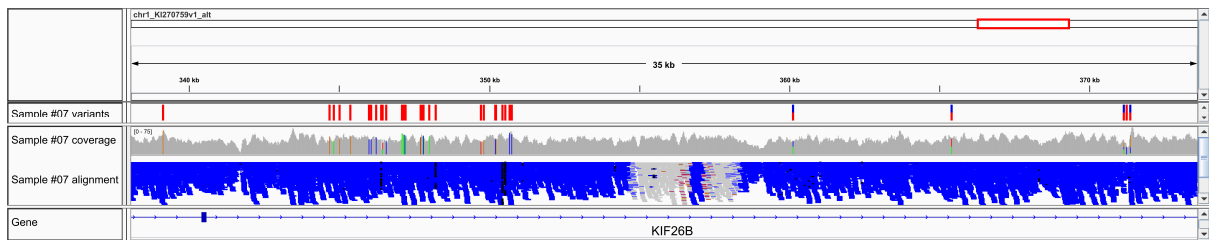

**Figure S18: REGION112 vs. KI270759.1.** (A) Sample #07 shows numerous homozygous variants in REGION112 (245,643,787-245,676,929 on chromosome 1). Starting from 245,680,000 most are ASDP-associated variants indicating a recombination between the KI270759.1 ALT-HAP and another (undefined) sequence. (B) The corresponding region on the alternate locus KI270759.1 displays many fewer discrepancies between aligned reads and ALT-HAP in the second half. One can infer that sample #07 is homozygous for this part for KI270759.1.

A

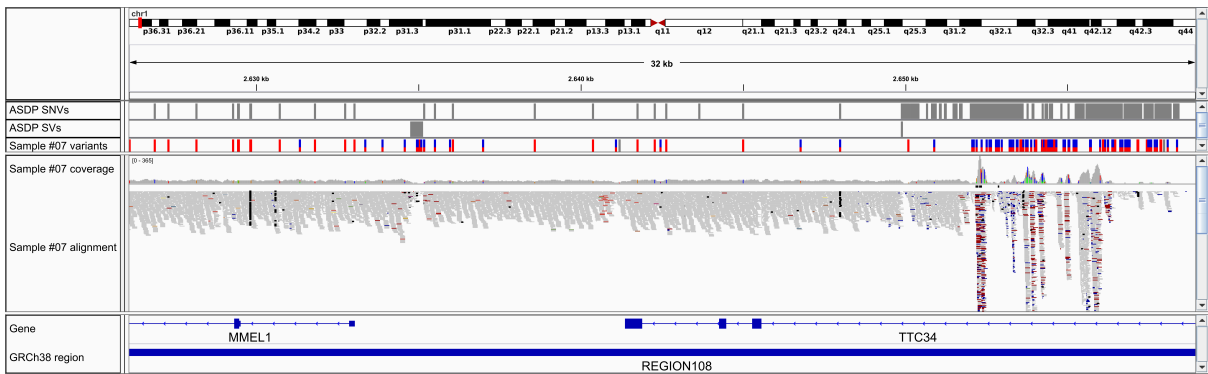

B

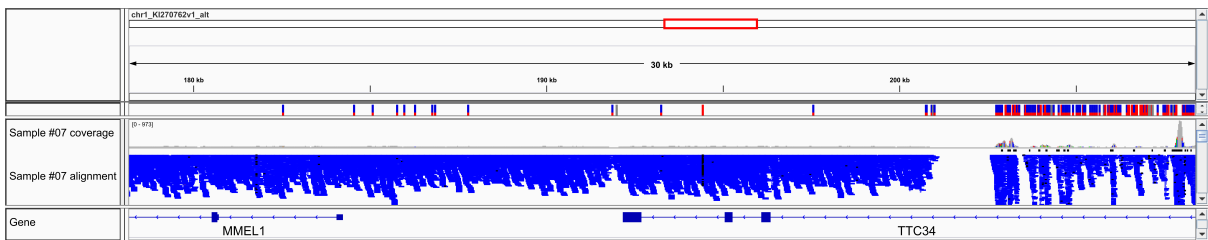

**Figure S19: REGION108 vs. KI270759.1.** (A) Sample #07 shows numerous homozygous ASDP-associated variants in REGION108 (2,626,066-2,658,966 on chromosome 1) up to 2,645,000, which suggests a recombination between the KI270762.1 ALT-HAP and another (undefined) sequence. (B) The corresponding region on the alternate locus KI270762.1 displays many fewer discrepancies between aligned reads and ALT-HAP in the part with the ASDP-associated variants and One can infer that sample #07 is homozygous for KI270762.1 for part of the region.

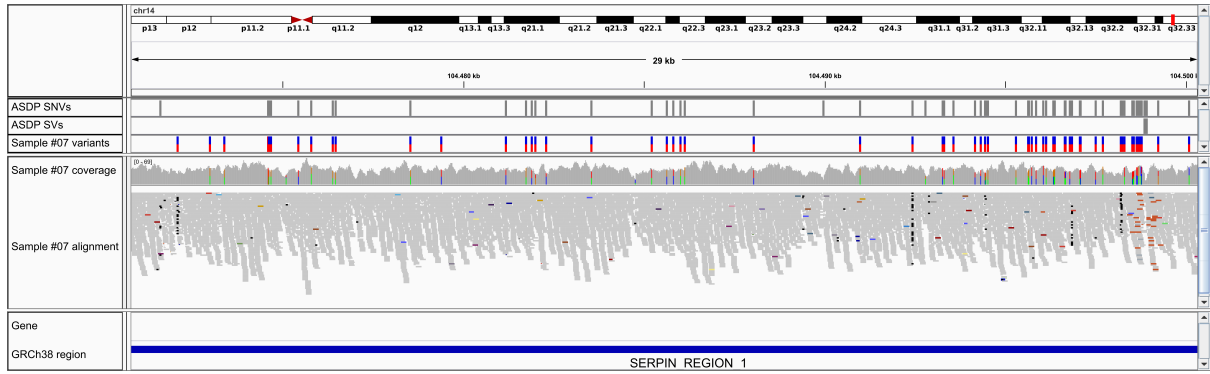

**Figure S20: SERPIN\_REGION\_1 vs. KI270845.1.** Sample #07 shows numerous heterozygous ASDP-associated variants origin from the alignment against KI270845.1 in SERPIN\_REGION\_1 (104,470,796-104,500,326 on chromosome 14). One can infer that sample #07 is heterozygous for KI270845.1.

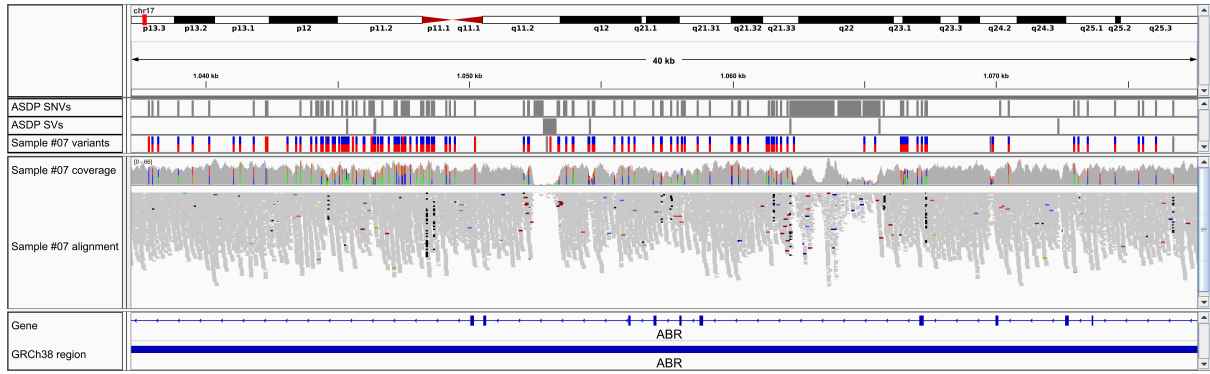

**Figure S21: ABR vs. KI270910.1.** Sample #07 shows numerous heterozygous ASDP-associated variants origin from the alignment against KI270910.1 in ABR (1,037,273-1,077,824 on chromosome 17). One can infer that sample #07 is heterozygous for KI270910.1.

A

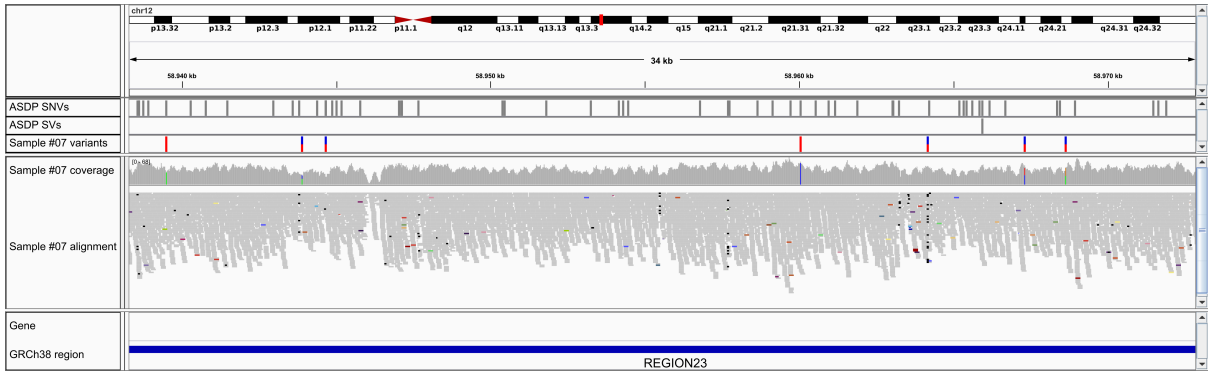

B

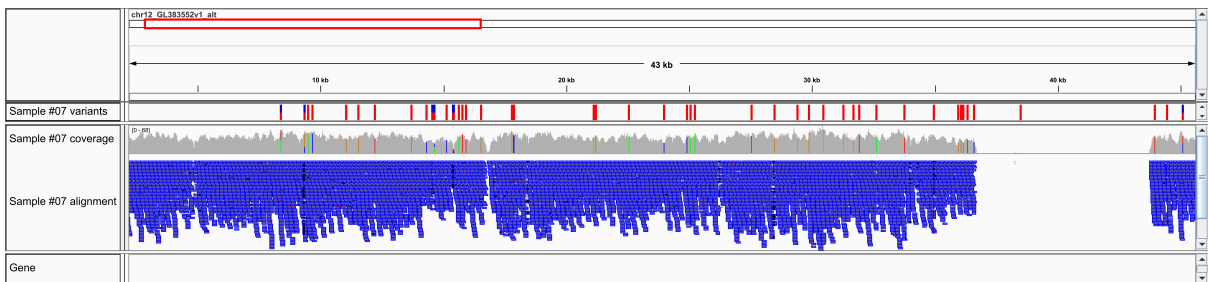

**Figure S22: REGION23 vs. GL383552.1.** These two figures demonstrate the overlap between known ASDPs and called variants for a randomly chosen region which was not called as homozygous or heterozygous ALT-HAP. **A** Sample #07 shows nearly no ASDP-associated variants in REGION23 (58,938,274-58,972,856 on chromosome 12). **B** The corresponding region on the alternate locus GL383552.1 shows several homozygous ASDP-associated variants. One can infer that sample #07 is homozygous for REF-HAP.

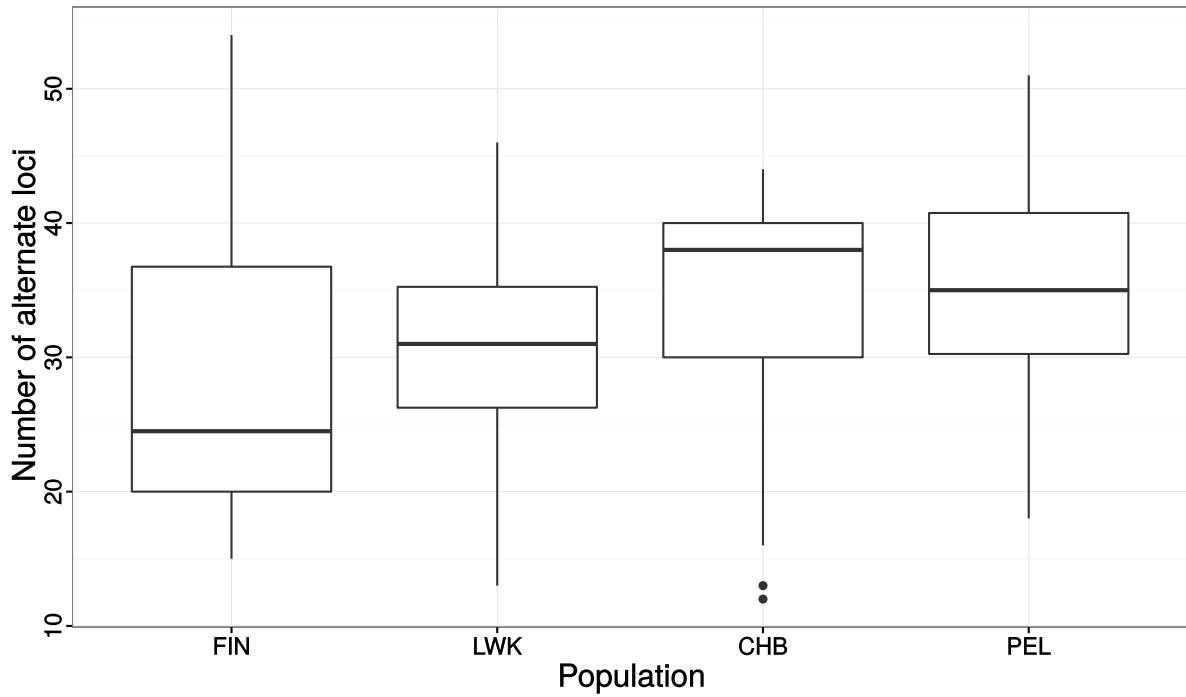

**Figure S23: Number of annotated alternate loci per population.** For four populations each 30 individuals the number of annotated alternate loci were counted. **FIN**: Finnish in Finland; **LWK**: Luhya in Webuye, Kenya; **CHB**: Han Chinese in Beijing, China; **PEL**: Peruvians from Lima, Peru.



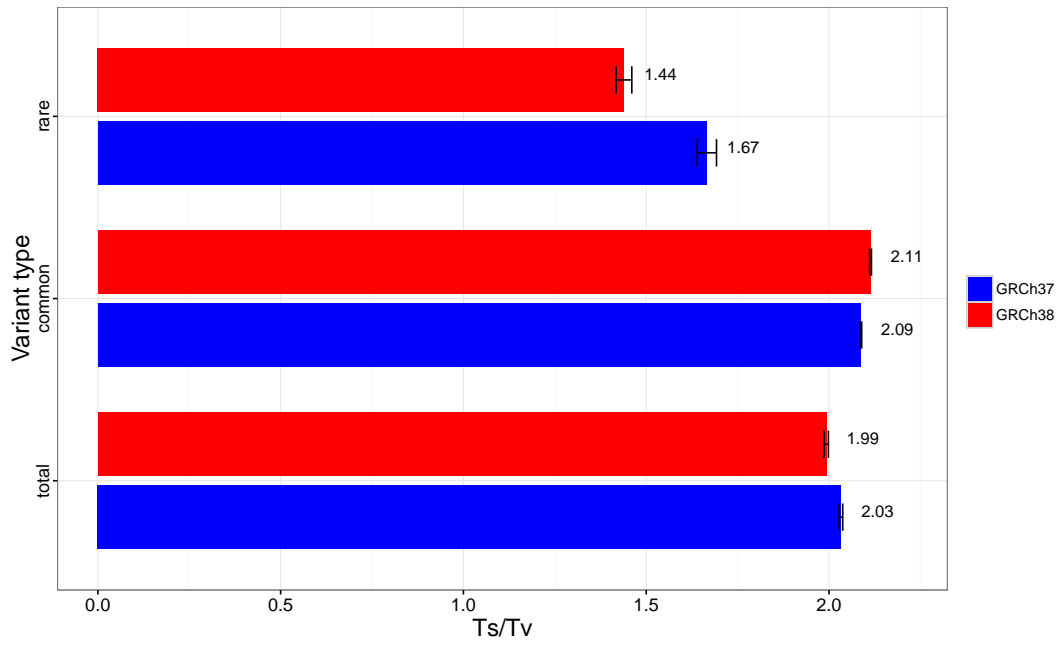

**Figure S24: Ts/Tv ratio for both genome builds.** The Ts/Tv ratio for GRCh37 (blue, bottom) and GRCh38 (red, top) for high quality variants (Phred-score  $\geq 30$ ) is shown for single nucleotide substitutions called as *rare*, for *common* SNPs (dbSNP 146), and for all SNPs (*total*).

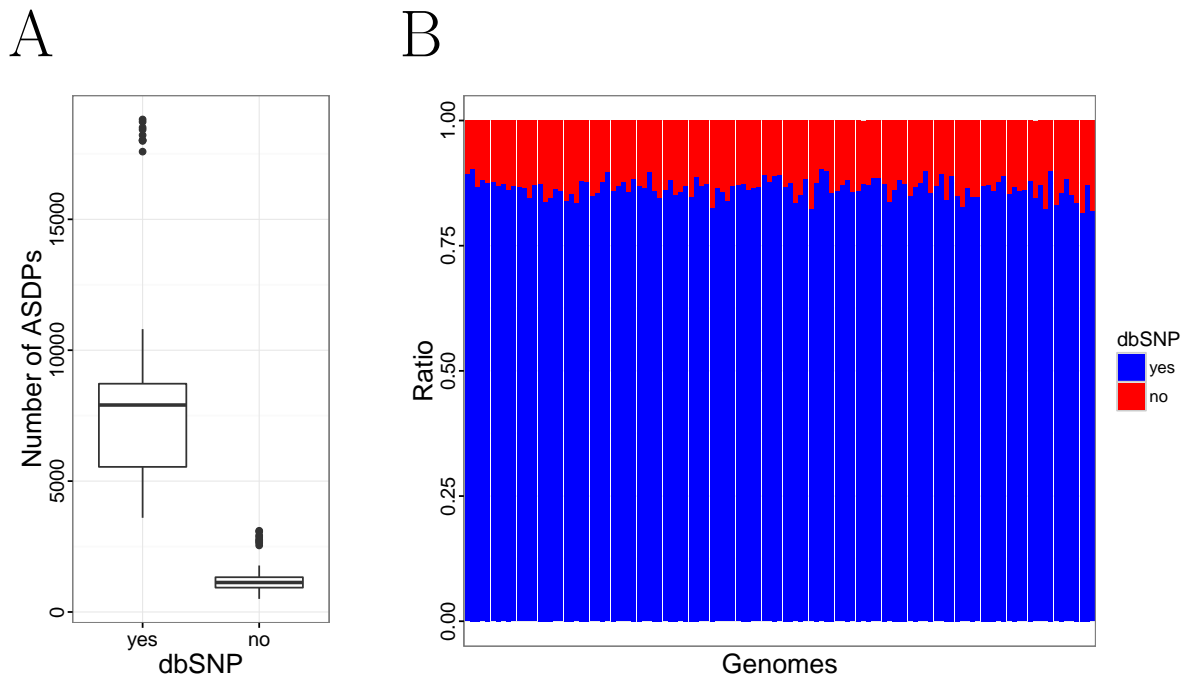

**Figure S25: In-house ASDPs with dbSNP annotation.** (A) The plot shows the distribution of the ASDP variants in our in-house genomes that are listed in dbSNP. In (B) the ratio of ASDP variants with dbSNP entries within genomes is plotted against those without dbSNP entries. On average 13.48% of the ASDP-associated variants are not listed in dbSNP.

A

```

2:1110:32373:30844 99 chr7 148380548 60 87M1I63M = 148380991 594 ...
SA:Z:chr7_KI270808v1_alt,162211,+,151M,17,1; ...
2:1110:32373:30844 147 chr7 148380991 60 151M = 148380548 -594 ...
SA:Z:chr7_KI270808v1_alt,162655,-,151M,4,17; ...

```

B

```

2:1110:32373:30844 2147 chr7_KI270808v1_alt 162211 60 151M ...
2:1110:32373:30844 2195 chr7_KI270808v1_alt 162655 60 151M ...

```

C

|                  | Left alignment                          | <i>Primary alignment</i>       | Right alignment                         |
|------------------|-----------------------------------------|--------------------------------|-----------------------------------------|
| Sample           | sampleP                                 |                                | sampleP                                 |
| Read length      | 151bp                                   |                                | 151bp                                   |
| Mapping Quality  | MAPQ 60                                 |                                | MAPQ 60                                 |
| Reference span   | chr7:148.380.548-148.380.697 (+)        |                                | chr7:148.380.991-148.381.141 (-)        |
| Cigar            | 87M1I63M                                |                                | 151M                                    |
| Location         | chr7:148.380.640                        |                                |                                         |
| Base             | T @ QV 42                               |                                |                                         |
| Mate is mapped   | yes                                     |                                | yes                                     |
| Mate start       | chr7:148.380.991 (-)                    |                                | chr7:148.380.548 (+)                    |
| Insert size      | 594                                     |                                | -594                                    |
| Pair orientation | First in pair<br>F1R2                   |                                | Second in pair<br>F1R2                  |
|                  |                                         | <i>Supplementary alignment</i> |                                         |
| Mapping Quality  | MAPQ 60                                 |                                | MAPQ 60                                 |
| Reference span   | chr7_KI270808v1.alt:162.211-162.360 (+) |                                | chr7_KI270808v1.alt:162.655-162.804 (-) |
| Cigar            | 151M                                    |                                | 151M                                    |
| Mate is mapped   | yes                                     |                                | yes                                     |
| Mate start       | chr7_KI270808v1.alt:162.655 (-)         |                                | chr7_KI270808v1.alt:162.211 (+)         |
| Insert size      | 595                                     |                                | -595                                    |
| Pair orientation | First in pair<br>F1R2                   |                                | Second in pair<br>F1R2                  |

**Figure S26: SAM format representation of the supplementary reads.** The read alignment representation is shown for one read pair spanning a homozygous ASDP-associated insertion from **Figure 3**. **(A)** Shortened representation of the read alignment in SAM format. Notice the sixth column with the CIGAR string for the alignment and the column with the supplementary alignment information (SA:Z). The first mate pair read indicates an insertion of a *T* which is not present in the supplementary alignment. **(B)** The information from the SAM formatted lines for the mate pair and **(C)** the primary and supplementary alignment.

| Field                       | Example          | Explanation                                                                                                                                                                                                                                                                                                     |
|-----------------------------|------------------|-----------------------------------------------------------------------------------------------------------------------------------------------------------------------------------------------------------------------------------------------------------------------------------------------------------------|
| <code>alt_asm_name</code>   | ALT_REF_LOCI_1   | Alternate assembly name                                                                                                                                                                                                                                                                                         |
| <code>prim_asm_name</code>  | Primary Assembly | Primary assembly name                                                                                                                                                                                                                                                                                           |
| <code>alt_scaf_name</code>  | HSCHR1_1_CTG3    | Name of alternate scaffold in GenBank file referred to by NT_187515.1                                                                                                                                                                                                                                           |
| <code>alt_scaf_acc</code>   | NT_187515.1      | Accession number of the alternate scaffold                                                                                                                                                                                                                                                                      |
| <code>parent_type</code>    | CHROMOSOME       | Type of sequence to which this alt scaffold is assigned                                                                                                                                                                                                                                                         |
| <code>parent_name</code>    | 1                | The name (i.e., chromosome 1)                                                                                                                                                                                                                                                                                   |
| <code>parent_acc</code>     | NC_000001.11     | Accession number of the parent sequence (corresponds to the information in the file <code>chr_accessions_GRCh38.p2</code> )                                                                                                                                                                                     |
| <code>region_name</code>    | REGION108        | Name of the genomic region to which this alternate scaffold is assigned (corresponds to the information in the file <code>genomic_regions_definitions.txt</code> ; in this example, the latter file specifies that REGION108 is located on NC_000001.11 with start position 2448811 and stop position 2791270). |
| <code>ori</code>            | +                | One of “+”, “-”, or “b”                                                                                                                                                                                                                                                                                         |
| <code>alt_scaf_start</code> | 1                | Start position of alignment with respect to the sequence of the alt locus.                                                                                                                                                                                                                                      |
| <code>alt_scaf_stop</code>  | 354444           | Stop position of alignment with respect to the sequence of the alt locus. In this example, the alignment includes the entire sequence of NT_187515.1, which is 354444 bp in length                                                                                                                              |
| <code>parent_start</code>   | 2448811          | Start position of alignment on parent                                                                                                                                                                                                                                                                           |
| <code>parent_stop</code>    | 2791270          | Stop position of alignment on parent. Here, the positions correspond exactly with the positions for REGION108 in the <code>genomic_regions_definitions.txt</code> file.                                                                                                                                         |
| <code>alt_start_tail</code> | 0                | This is the length of an insertion as compared to the reference sequence. For instance, NT_187517.1 has an <code>alt_start_tail</code> of 20,632 nucleotides and the alignment with the corresponding reference begins at position 20,633 of the sequence in NT_187517.1                                        |
| <code>alt_stop_tail</code>  | 0                | Analogous to <code>alt_start_tail</code> but the insertion is at the end of the scaffold sequence; see for instance NT_187557.1.                                                                                                                                                                                |

**Table S1:** The fields of the “alt\_scaffold\_placement.txt” files.

| Range       | Number | Percentage |
|-------------|--------|------------|
| <100 kb     | 27     | 15.2%      |
| 100-200 kb  | 89     | 50.0%      |
| 200-500 kb  | 43     | 24.1%      |
| 500 kb-2 Mb | 13     | 7.3%       |
| >2 Mb       | 6      | 3.4%       |

**Table S2:** Size distribution of the 178 REF-HAP regions of the GRCh38 genome build.

| Impact   | Counts   | SO-term                                                                |                                                            |
|----------|----------|------------------------------------------------------------------------|------------------------------------------------------------|
| HIGH     | 1136     | mnv                                                                    |                                                            |
|          | 168      | stop_gained                                                            |                                                            |
|          | 126      | stop_lost                                                              |                                                            |
|          | 81       | internal_feature_elongation complex_substitution                       |                                                            |
|          | 79       | frameshift_elongation                                                  |                                                            |
|          | 75       | frameshift_variant                                                     |                                                            |
|          | 68       | feature_truncation complex_substitution                                |                                                            |
|          | 47       | frameshift_truncation                                                  |                                                            |
|          | 22       | mnv stop_gained                                                        |                                                            |
|          | 14       | splice_donor_variant non_coding_transcript_intron_variant              |                                                            |
|          | 9        | frameshift_truncation complex_substitution splice_donor_variant        |                                                            |
|          | 9        | mnv splice_region_variant                                              |                                                            |
|          | 8        | frameshift_truncation complex_substitution splice_acceptor_variant     |                                                            |
|          | 8        | splice_donor_variant coding_transcript_intron_variant                  |                                                            |
|          | 7        | start_lost missense_variant                                            |                                                            |
|          | 6        | splice_acceptor_variant coding_transcript_intron_variant               |                                                            |
|          | 3        | feature_truncation complex_substitution splice_acceptor_variant        |                                                            |
|          | 3        | splice_acceptor_variant non_coding_transcript_intron_variant           |                                                            |
|          | 3        | stop_lost missense_variant                                             |                                                            |
|          | 2        | start_lost                                                             |                                                            |
|          | 1        | complex_substitution stop_lost                                         |                                                            |
|          | 1        | feature_truncation complex_substitution splice_donor_variant           |                                                            |
|          | 1        | feature_truncation complex_substitution splice_region_variant          |                                                            |
|          | 1        | frameshift_elongation complex_substitution splice_acceptor_variant     |                                                            |
|          | 1        | frameshift_truncation splice_acceptor_variant                          |                                                            |
|          | 1        | frameshift_truncation stop_lost                                        |                                                            |
|          | 1        | frameshift_variant complex_substitution splice_donor_variant           |                                                            |
|          | 1        | frameshift_variant complex_substitution stop_lost                      |                                                            |
|          | 1        | frameshift_variant splice_region_variant                               |                                                            |
|          | 1        | internal_feature_elongation complex_substitution splice_region_variant |                                                            |
|          | 1        | splice_acceptor_variant 5_prime_utr_variant                            |                                                            |
|          | 1        | splice_acceptor_variant non_coding_transcript_exon_variant             |                                                            |
|          | 1        | stop_gained splice_region_variant                                      |                                                            |
|          | MODERATE | 5381                                                                   | missense_variant                                           |
|          |          | 71                                                                     | missense_variant splice_region_variant                     |
|          |          | 321                                                                    | splice_region_variant coding_transcript_intron_variant     |
|          |          | 59                                                                     | splice_region_variant non_coding_transcript_intron_variant |
|          |          | 45                                                                     | splice_region_variant synonymous_variant                   |
|          |          | 32                                                                     | splice_region_variant non_coding_transcript_exon_variant   |
|          |          | 31                                                                     | disruptive_inframe_deletion                                |
| 15       |          | disruptive_inframe_insertion direct_tandem_duplication                 |                                                            |
| 14       |          | disruptive_inframe_insertion                                           |                                                            |
| 12       |          | splice_region_variant 5_prime_utr_variant                              |                                                            |
| 11       |          | inframe_deletion                                                       |                                                            |
| 3        |          | inframe_insertion                                                      |                                                            |
| 2        |          | splice_region_variant 3_prime_utr_variant                              |                                                            |
| 1        |          | inframe_insertion direct_tandem_duplication                            |                                                            |
| LOW      |          | 65765                                                                  | coding_transcript_intron_variant                           |
|          |          | 14482                                                                  | non_coding_transcript_intron_variant                       |
|          |          | 2251                                                                   | synonymous_variant                                         |
|          | 1963     | 3_prime_utr_variant                                                    |                                                            |
|          | 1713     | non_coding_transcript_exon_variant                                     |                                                            |
| s        | 1276     | 5_prime_utr_variant                                                    |                                                            |
|          | 7        | stop_retained_variant synonymous_variant                               |                                                            |
| MODIFIER | 125978   | intergenic_variant                                                     |                                                            |
|          | 5762     | downstream_gene_variant                                                |                                                            |
|          | 5251     | upstream_gene_variant                                                  |                                                            |

**Table S3: Sequence ontology categories of the ASDPs identified in the GRCh38.p2 genome release.** The curated dataset of valid ASDPs (collapsed, window 50b mismatches 10) was annotated using Jannovar<sup>3</sup> (v. 0.16) and the RefSeq GRCh38.p2 annotations. Variant categories (SO-term(s)<sup>4</sup> shown in the third column) are sorted according to their putative impact (first column) then total counts (second column) of annotated ASDPs.

**Table S4: GWAS Hits that Overlap ASDPs** The GWAS catalog was downloaded (2016-02-01). Each GWAS hit was analyzed for overlap with the curated dataset of valid ASDPs.

| Chromosome | Position  | dbSNP ID    | Reference | Alt allele |
|------------|-----------|-------------|-----------|------------|
| 1          | 155225189 | rs2049805   | T         | C          |
| 1          | 243852691 | rs4430311   | C         | T          |
| 11         | 589564    | rs4963128   | T         | C          |
| 11         | 1100037   | rs7934606   | C         | T          |
| 11         | 3007859   | rs7481584   | G         | A          |
| 11         | 3015094   | rs739401    | C         | T          |
| 11         | 56698623  | rs1397048   | C         | T          |
| 12         | 11063716  | rs2708377   | C         | T          |
| 12         | 11126493  | rs1031391   | C         | G          |
| 12         | 28040056  | rs7964407   | G         | A          |
| 15         | 28111713  | rs1129038   | C         | T          |
| 15         | 28120472  | rs12913832  | A         | G          |
| 15         | 28268218  | rs916977    | T         | C          |
| 15         | 28285036  | rs1667394   | C         | T          |
| 15         | 28760947  | rs8033165   | C         | T          |
| 15         | 29132552  | rs2636061   | A         | G          |
| 15         | 29596192  | rs1471225   | T         | C          |
| 15         | 29901265  | rs711355    | T         | C          |
| 15         | 30606129  | rs143536437 | C         | T          |
| 15         | 31171175  | rs7169523   | G         | A          |
| 15         | 31501727  | rs7164569   | A         | G          |
| 15         | 32702555  | rs4779584   | T         | C          |
| 16         | 489140    | rs2038227   | C         | A          |
| 16         | 15493640  | rs34792     | C         | G          |
| 16         | 16029602  | rs924135    | A         | T          |
| 16         | 16033378  | rs2062541   | G         | A          |
| 16         | 16034885  | rs246234    | C         | G          |
| 16         | 16162910  | rs3213473   | T         | G          |
| 16         | 16636869  | rs9937036   | GATAT     | G          |
| 16         | 16864058  | rs7186128   | G         | A          |
| 17         | 189133    | rs7217319   | T         | C          |
| 17         | 36031260  | rs712046    | C         | T          |
| 17         | 37666305  | rs6607284   | T         | C          |
| 17         | 37736310  | rs2005705   | G         | A          |
| 17         | 37736525  | rs757210    | C         | T          |
| 17         | 37738049  | rs4430796   | A         | G          |
| 17         | 37741165  | rs7501939   | C         | T          |
| 17         | 41094387  | rs4006360   | C         | T          |
| 17         | 45436075  | rs11012     | C         | T          |
| 17         | 45439036  | rs17631303  | A         | G          |
| 17         | 46710944  | rs183211    | G         | A          |
| 17         | 46751565  | rs199533    | G         | A          |
| 17         | 46779275  | rs199515    | G         | C          |
| 17         | 46781778  | rs415430    | C         | T          |
| 17         | 46788073  | rs2074404   | T         | G          |
| 17         | 46788237  | rs199498    | T         | C          |
| 18         | 78655450  | rs66591657  | A         | G          |
| 19         | 54109321  | rs254262    | G         | A          |
| 19         | 54172738  | rs2576452   | T         | C          |
| 19         | 54173495  | rs8736      | T         | C          |
| 19         | 54193224  | rs7595      | T         | C          |
| 19         | 54288907  | rs386000    | C         | G          |

*continued on the next page*

| Chromosome | Position  | dbSNP ID    | Reference | Alt allele |
|------------|-----------|-------------|-----------|------------|
| 19         | 54293995  | rs103294    | T         | C          |
| 19         | 54404500  | rs11084337  | C         | T          |
| 19         | 54871595  | rs11672983  | G         | A          |
| 2          | 1404043   | rs11675434  | C         | T          |
| 2          | 1413472   | rs2071403   | A         | G          |
| 2          | 1434216   | rs1514687   | T         | G          |
| 22         | 35729217  | rs2016586   | T         | G          |
| 22         | 42130692  | rs1065852   | G         | A          |
| 22         | 42207808  | rs6002655   | C         | T          |
| 22         | 42225997  | rs5758659   | C         | T          |
| 4          | 68726064  | rs293428    | A         | G          |
| 4          | 189616909 | rs13145041  | A         | G          |
| 5          | 29040014  | rs488884    | T         | G          |
| 5          | 33879687  | rs1364044   | C         | T          |
| 6          | 28744470  | rs115329265 | A         | G          |
| 6          | 28808340  | rs4324798   | G         | A          |
| 6          | 28948475  | rs4947339   | C         | T          |
| 6          | 29116455  | rs3129109   | T         | C          |
| 6          | 29212944  | rs9257616   | G         | A          |
| 6          | 29387425  | rs3094548   | G         | C          |
| 6          | 29388554  | rs9257809   | A         | G          |
| 6          | 29466637  | rs4713226   | G         | A          |
| 6          | 29639269  | rs3095267   | GG        | CA         |
| 6          | 29643654  | rs29232     | C         | T          |
| 6          | 29658544  | rs2252711   | T         | C          |
| 6          | 29702484  | rs3129055   | A         | G          |
| 6          | 29734733  | rs2523395   | G         | A          |
| 6          | 29737882  | rs2523393   | A         | G          |
| 6          | 29755384  | rs9258260   | C         | T          |
| 6          | 29860883  | rs2523822   | A         | G          |
| 6          | 29881842  | rs2523809   | G         | T          |
| 6          | 29931900  | rs2524005   | G         | A          |
| 6          | 29938914  | rs2860580   | A         | G          |
| 6          | 29950322  | rs2517713   | G         | T          |
| 6          | 29952555  | rs9260489   | T         | G          |
| 6          | 29954963  | rs16896742  | A         | G          |
| 6          | 29956061  | rs2571391   | A         | C          |
| 6          | 29966386  | rs6935053   | A         | C          |
| 6          | 29967473  | rs3893464   | G         | A          |
| 6          | 29974166  | rs2523946   | C         | T          |
| 6          | 29974306  | rs3823355   | C         | T          |
| 6          | 29975290  | rs6904029   | G         | A          |
| 6          | 30002812  | rs7758512   | T         | G          |
| 6          | 30006148  | rs4313034   | C         | T          |
| 6          | 30049294  | rs6917603   | T         | C          |
| 6          | 30057726  | rs259919    | G         | A          |
| 6          | 30064745  | rs8321      | A         | C          |
| 6          | 30105999  | rs115457135 | G         | A          |
| 6          | 30108087  | rs2023472   | A         | G          |
| 6          | 30197496  | rs2523722   | C         | T          |
| 6          | 30206354  | rs2021722   | C         | T          |
| 6          | 30211645  | rs2844775   | G         | A          |
| 6          | 30256461  | rs116624347 | G         | T          |
| 6          | 30345563  | rs6986      | G         | C          |
| 6          | 30569829  | rs3132613   | C         | G          |
| 6          | 30711851  | rs3094093   | T         | A          |

*continued on the next page*



| Chromosome | Position | dbSNP ID   | Reference | Alt allele |
|------------|----------|------------|-----------|------------|
| 6          | 30768374 | rs12526186 | C         | T          |
| 6          | 30769709 | rs3094117  | A         | C          |
| 6          | 30799168 | rs4587207  | A         | G          |
| 6          | 30806580 | rs3130783  | G         | A          |
| 6          | 30814225 | rs886424   | C         | T          |
| 6          | 30830214 | rs7749924  | C         | T          |
| 6          | 30831622 | rs9501030  | T         | A          |
| 6          | 30880476 | rs7756521  | T         | C          |
| 6          | 30908375 | rs1052693  | C         | T          |
| 6          | 30945681 | rs3132581  | G         | A          |
| 6          | 30952347 | rs3132580  | G         | A          |
| 6          | 31008442 | rs28360974 | G         | A          |
| 6          | 31034839 | rs4248154  | C         | T          |
| 6          | 31039078 | rs2844665  | T         | C          |
| 6          | 31049201 | rs2251830  | C         | A          |
| 6          | 31050630 | rs2517532  | A         | G          |
| 6          | 31050769 | rs2523864  | C         | T          |
| 6          | 31057031 | rs9262632  | A         | G          |
| 6          | 31062345 | rs2517510  | T         | G          |
| 6          | 31090563 | rs3130544  | C         | A          |
| 6          | 31101750 | rs9263567  | T         | A          |
| 6          | 31106253 | rs6457327  | A         | C          |
| 6          | 31113428 | rs2233956  | T         | C          |
| 6          | 31125810 | rs3815087  | G         | A          |
| 6          | 31129524 | rs3130559  | C         | T          |
| 6          | 31133897 | rs3130564  | C         | T          |
| 6          | 31138491 | rs3130573  | A         | G          |
| 6          | 31139410 | rs1265093  | G         | A          |
| 6          | 31139481 | rs2285803  | T         | C          |
| 6          | 31143579 | rs9263739  | C         | T          |
| 6          | 31150242 | rs1265112  | T         | C          |
| 6          | 31150734 | rs130067   | T         | G          |
| 6          | 31161533 | rs7750641  | C         | T          |
| 6          | 31162816 | rs1419881  | G         | A          |
| 6          | 31167111 | rs3130931  | T         | C          |
| 6          | 31168676 | rs3130501  | A         | G          |
| 6          | 31168937 | rs3132524  | T         | C          |
| 6          | 31171675 | rs879882   | T         | C          |
| 6          | 31172270 | rs1265159  | G         | A          |
| 6          | 31174468 | rs3094188  | C         | A          |
| 6          | 31175805 | rs3131018  | A         | C          |
| 6          | 31188008 | rs1265181  | G         | C          |
| 6          | 31202751 | rs9263871  | A         | G          |
| 6          | 31216419 | rs3869109  | A         | G          |
| 6          | 31218249 | rs9263963  | A         | T          |
| 6          | 31229737 | rs3130941  | C         | G          |
| 6          | 31253891 | rs3095254  | C         | G          |
| 6          | 31264334 | rs3130542  | A         | G          |
| 6          | 31267728 | rs2853953  | G         | A          |
| 6          | 31270541 | rs9264638  | G         | A          |
| 6          | 31272654 | rs2074488  | G         | T          |
| 6          | 31273332 | rs13191343 | C         | T          |
| 6          | 31274397 | rs2524079  | G         | A          |
| 6          | 31279426 | rs2853946  | A         | T          |
| 6          | 31284619 | rs2524054  | A         | C          |
| 6          | 31285148 | rs12191877 | C         | T          |

*continued on the next page*

| Chromosome | Position | dbSNP ID    | Reference | Alt allele |
|------------|----------|-------------|-----------|------------|
| 6          | 31291060 | rs9468925   | G         | A          |
| 6          | 31295974 | rs2894207   | T         | C          |
| 6          | 31297713 | rs2247056   | T         | C          |
| 6          | 31303939 | rs9461688   | A         | G          |
| 6          | 31304484 | rs6457374   | C         | T          |
| 6          | 31306603 | rs9264942   | T         | C          |
| 6          | 31306778 | rs10484554  | C         | T          |
| 6          | 31344549 | rs3134792   | T         | G          |
| 6          | 31354782 | rs2523608   | G         | A          |
| 6          | 31355013 | rs2523607   | T         | A          |
| 6          | 31356323 | rs148203517 | G         | T          |
| 6          | 31359287 | rs2523590   | T         | C          |
| 6          | 31359924 | rs9378249   | T         | G          |
| 6          | 31364962 | rs9266359   | C         | T          |
| 6          | 31368124 | rs2922994   | A         | G          |
| 6          | 31368641 | rs9266406   | G         | A          |
| 6          | 31379045 | rs9266629   | T         | C          |
| 6          | 31379674 | rs2244020   | A         | G          |
| 6          | 31382927 | rs1521      | C         | T          |
| 6          | 31384336 | rs9266772   | T         | C          |
| 6          | 31385552 | rs2596565   | G         | A          |
| 6          | 31394533 | rs16899524  | C         | T          |
| 6          | 31398818 | rs2596542   | C         | T          |
| 6          | 31412752 | rs2256183   | A         | G          |
| 6          | 31422633 | rs2516448   | T         | C          |
| 6          | 31440488 | rs2524276   | C         | A          |
| 6          | 31462150 | rs3094228   | T         | C          |
| 6          | 31466334 | rs3094604   | A         | G          |
| 6          | 31472892 | rs3828890   | C         | G          |
| 6          | 31479019 | rs2248462   | G         | A          |
| 6          | 31481199 | rs3099844   | C         | A          |
| 6          | 31504943 | rs2855812   | G         | T          |
| 6          | 31507709 | rs3132468   | C         | T          |
| 6          | 31513522 | rs2516399   | A         | G          |
| 6          | 31537703 | rs2734583   | A         | G          |
| 6          | 31574531 | rs1799964   | T         | C          |
| 6          | 31600692 | rs2857595   | G         | A          |
| 6          | 31605179 | rs2844479   | A         | C          |
| 6          | 31607499 | rs9348876   | C         | T          |
| 6          | 31620607 | rs2857693   | G         | T          |
| 6          | 31623121 | rs2736172   | C         | T          |
| 6          | 31628105 | rs1046080   | C         | A          |
| 6          | 31634066 | rs3115663   | T         | C          |
| 6          | 31635190 | rs1046089   | G         | A          |
| 6          | 31635993 | rs9267522   | A         | G          |
| 6          | 31648589 | rs805303    | G         | A          |
| 6          | 31652743 | rs3117582   | T         | G          |
| 6          | 31654829 | rs805297    | C         | A          |
| 6          | 31664357 | rs3130618   | C         | A          |
| 6          | 31753256 | rs3131379   | G         | A          |
| 6          | 31834764 | rs9368699   | T         | C          |
| 6          | 31870936 | rs494620    | G         | A          |
| 6          | 31876147 | rs2736428   | C         | T          |
| 6          | 31883457 | rs652888    | A         | G          |
| 6          | 31899476 | rs9267663   | C         | T          |
| 6          | 31902549 | rs558702    | G         | A          |

*continued on the next page*

| Chromosome | Position | dbSNP ID   | Reference | Alt allele |
|------------|----------|------------|-----------|------------|
| 6          | 31903079 | rs9267665  | C         | T          |
| 6          | 31915902 | rs9267673  | C         | T          |
| 6          | 31946403 | rs641153   | G         | A          |
| 6          | 31949174 | rs541862   | T         | C          |
| 6          | 31949763 | rs4151657  | T         | C          |
| 6          | 31962664 | rs592229   | G         | T          |
| 6          | 31973120 | rs389884   | A         | G          |
| 6          | 32051969 | rs2857009  | G         | C          |
| 6          | 32059031 | rs12198173 | G         | A          |
| 6          | 32082290 | rs185819   | T         | C          |
| 6          | 32082981 | rs1150754  | C         | T          |
| 6          | 32102292 | rs41268896 | G         | A          |
| 6          | 32103240 | rs3117181  | C         | G          |
| 6          | 32107027 | rs12153855 | T         | C          |
| 6          | 32108722 | rs2269426  | G         | A          |
| 6          | 32142202 | rs204999   | A         | G          |
| 6          | 32146738 | rs9296009  | A         | T          |
| 6          | 32159700 | rs3134950  | C         | A          |
| 6          | 32166733 | rs3096697  | G         | A          |
| 6          | 32168770 | rs1061808  | T         | G          |
| 6          | 32178715 | rs3134945  | C         | A          |
| 6          | 32183666 | rs2070600  | C         | T          |
| 6          | 32187804 | rs204993   | A         | G          |
| 6          | 32190542 | rs176095   | A         | G          |
| 6          | 32197667 | rs2071278  | A         | G          |
| 6          | 32203298 | rs3132935  | A         | G          |
| 6          | 32203906 | rs2071277  | T         | C          |
| 6          | 32205216 | rs3131296  | C         | T          |
| 6          | 32212119 | rs2071286  | C         | T          |
| 6          | 32216568 | rs404860   | T         | C          |
| 6          | 32220606 | rs422951   | T         | C          |
| 6          | 32222251 | rs3132946  | A         | G          |
| 6          | 32222629 | rs443198   | A         | G          |
| 6          | 32222843 | rs3134931  | T         | C          |
| 6          | 32224554 | rs3096702  | A         | G          |
| 6          | 32237268 | rs549182   | G         | A          |
| 6          | 32237333 | rs9267911  | T         | C          |
| 6          | 32240547 | rs424232   | C         | T          |
| 6          | 32249315 | rs6936204  | T         | C          |
| 6          | 32249455 | rs9267972  | A         | G          |
| 6          | 32251066 | rs3115573  | A         | G          |
| 6          | 32251212 | rs9296015  | G         | A          |
| 6          | 32255481 | rs3130320  | T         | C          |
| 6          | 32276850 | rs3130340  | T         | C          |
| 6          | 32289789 | rs926070   | G         | A          |
| 6          | 32293475 | rs7775397  | T         | G          |
| 6          | 32315077 | rs6910071  | A         | G          |
| 6          | 32338202 | rs3129900  | G         | T          |
| 6          | 32347950 | rs910049   | T         | C          |
| 6          | 32351860 | rs9268301  | G         | A          |
| 6          | 32368410 | rs3129934  | T         | C          |
| 6          | 32368989 | rs3129939  | A         | G          |
| 6          | 32369853 | rs2273017  | G         | A          |
| 6          | 32370918 | rs3129943  | A         | G          |
| 6          | 32371299 | rs2050190  | A         | G          |
| 6          | 32373576 | rs9268402  | G         | A          |

*continued on the next page*

| Chromosome | Position | dbSNP ID    | Reference | Alt allele |
|------------|----------|-------------|-----------|------------|
| 6          | 32390493 | rs3117099   | G         | A          |
| 6          | 32390736 | rs3117098   | G         | A          |
| 6          | 32395438 | rs1980493   | T         | C          |
| 6          | 32396039 | rs2076530   | T         | C          |
| 6          | 32396067 | rs9268480   | C         | T          |
| 6          | 32396178 | rs2076529   | T         | C          |
| 6          | 32400310 | rs3817963   | T         | C          |
| 6          | 32405921 | rs3806156   | G         | T          |
| 6          | 32408196 | rs3763309   | C         | A          |
| 6          | 32408694 | rs3763313   | A         | C          |
| 6          | 32409011 | rs3763317   | C         | T          |
| 6          | 32411712 | rs9268516   | C         | T          |
| 6          | 32415273 | rs4959027   | A         | G          |
| 6          | 32416944 | rs9268542   | A         | G          |
| 6          | 32420032 | rs2395163   | T         | C          |
| 6          | 32421871 | rs3135363   | A         | G          |
| 6          | 32425204 | rs3135350   | C         | T          |
| 6          | 32433162 | rs115306967 | G         | C          |
| 6          | 32433302 | rs3129860   | A         | G          |
| 6          | 32433440 | rs3135338   | C         | T          |
| 6          | 32438565 | rs3129871   | A         | C          |
| 6          | 32440750 | rs9268645   | C         | G          |
| 6          | 32441753 | rs3129882   | G         | A          |
| 6          | 32443869 | rs7192      | T         | G          |
| 6          | 32444658 | rs3177928   | G         | A          |
| 6          | 32445274 | rs3135388   | A         | G          |
| 6          | 32445682 | rs2227139   | G         | A          |
| 6          | 32445768 | rs3129889   | G         | A          |
| 6          | 32446496 | rs3129890   | T         | C          |
| 6          | 32457105 | rs7763262   | T         | C          |
| 6          | 32460508 | rs6903608   | C         | T          |
| 6          | 32460938 | rs114800139 | G         | A          |
| 6          | 32460995 | rs9268839   | A         | G          |
| 6          | 32461866 | rs9268853   | T         | C          |
| 6          | 32461942 | rs9268856   | C         | A          |
| 6          | 32463370 | rs9268877   | A         | G          |
| 6          | 32464185 | rs114002140 | A         | G          |
| 6          | 32464300 | rs9268905   | G         | C          |
| 6          | 32465058 | rs9268923   | C         | T          |
| 6          | 32465390 | rs2395185   | G         | T          |
| 6          | 32476421 | rs12194148  | G         | T          |
| 6          | 32476767 | rs12195582  | C         | T          |
| 6          | 32478940 | rs7453498   | T         | C          |
| 6          | 32480822 | rs7748270   | C         | T          |
| 6          | 32533367 | rs2157337   | C         | T          |
| 6          | 32553130 | rs3828840   | T         | C          |
| 6          | 32601914 | rs477515    | G         | A          |
| 6          | 32604474 | rs2858870   | T         | C          |
| 6          | 32605694 | rs9270965   | A         | G          |
| 6          | 32606214 | rs9270984   | T         | G          |
| 6          | 32606283 | rs9270986   | A         | C          |
| 6          | 32606394 | rs615672    | G         | C          |
| 6          | 32607881 | rs3021304   | G         | C          |
| 6          | 32608701 | rs9271100   | T         | C          |
| 6          | 32609018 | rs9271117   | CA        | TG         |
| 6          | 32609603 | rs660895    | A         | G          |

*continued on the next page*

| Chromosome | Position | dbSNP ID   | Reference | Alt allele |
|------------|----------|------------|-----------|------------|
| 6          | 32610753 | rs9271192  | C         | A          |
| 6          | 32615965 | rs9271348  | G         | A          |
| 6          | 32619077 | rs9271366  | G         | A          |
| 6          | 32623148 | rs3129763  | G         | A          |
| 6          | 32623176 | rs9271588  | T         | C          |
| 6          | 32624423 | rs9271640  | T         | C          |
| 6          | 32627446 | rs9271858  | A         | G          |
| 6          | 32632222 | rs9272105  | G         | A          |
| 6          | 32633026 | rs9272143  | T         | C          |
| 6          | 32634492 | rs9272219  | G         | T          |
| 6          | 32635230 | rs2040406  | A         | G          |
| 6          | 32636595 | rs9272346  | G         | A          |
| 6          | 32638107 | rs2187668  | C         | T          |
| 6          | 32638979 | rs9272535  | G         | A          |
| 6          | 32644619 | rs6927022  | TA        | CG         |
| 6          | 32658092 | rs9273349  | T         | C          |
| 6          | 32658353 | rs7744020  | G         | A          |
| 6          | 32658495 | rs9273363  | C         | A          |
| 6          | 32658534 | rs6906021  | T         | C          |
| 6          | 32658824 | rs9273373  | A         | G          |
| 6          | 32659936 | rs1063355  | GT        | AG         |
| 6          | 32659937 | rs1063355  | T         | G          |
| 6          | 32660651 | rs2854275  | C         | A          |
| 6          | 32665055 | rs9274407  | A         | T          |
| 6          | 32665936 | rs9274477  | A         | G          |
| 6          | 32683763 | rs17212223 | C         | T          |
| 6          | 32687441 | rs2856683  | T         | G          |
| 6          | 32689801 | rs7774434  | T         | C          |
| 6          | 32690302 | rs7775228  | T         | C          |
| 6          | 32690533 | rs9469220  | G         | A          |
| 6          | 32692101 | rs9275224  | A         | G          |
| 6          | 32695854 | rs3129720  | T         | C          |
| 6          | 32696074 | rs6457617  | C         | T          |
| 6          | 32696222 | rs6457620  | G         | C          |
| 6          | 32696681 | rs2647012  | T         | C          |
| 6          | 32697183 | rs9357152  | A         | G          |
| 6          | 32698518 | rs9275319  | A         | G          |
| 6          | 32698883 | rs9275326  | C         | T          |
| 6          | 32700133 | rs2647044  | G         | A          |
| 6          | 32700323 | rs2647045  | G         | A          |
| 6          | 32700559 | rs2647046  | A         | C          |
| 6          | 32701379 | rs9275390  | T         | C          |
| 6          | 32702178 | rs9275406  | G         | T          |
| 6          | 32702478 | rs2856718  | C         | T          |
| 6          | 32702531 | rs2856717  | A         | G          |
| 6          | 32707332 | rs9275524  | T         | C          |
| 6          | 32710135 | rs9275563  | C         | T          |
| 6          | 32710820 | rs4273729  | C         | G          |
| 6          | 32711222 | rs9275572  | A         | G          |
| 6          | 32712799 | rs7764819  | T         | G          |
| 6          | 32713151 | rs7765379  | T         | G          |
| 6          | 32713500 | rs2858331  | A         | G          |
| 6          | 32713578 | rs9275595  | T         | C          |
| 6          | 32713854 | rs9275596  | C         | T          |
| 6          | 32713892 | rs6935723  | T         | C          |
| 6          | 32713899 | rs3104402  | T         | G          |

*continued on the next page*

| Chromosome | Position | dbSNP ID   | Reference | Alt allele |
|------------|----------|------------|-----------|------------|
| 6          | 32714360 | rs3957148  | A         | G          |
| 6          | 32717773 | rs3916765  | G         | A          |
| 6          | 32720196 | rs9275698  | A         | G          |
| 6          | 32730008 | rs2859113  | C         | G          |
| 6          | 32732306 | rs2858884  | A         | C          |
| 6          | 32739518 | rs9276370  | G         | T          |
| 6          | 32756140 | rs7756516  | C         | T          |
| 6          | 32757416 | rs2301271  | A         | G          |
| 6          | 32759026 | rs1049110  | C         | T          |
| 6          | 32762235 | rs7453920  | A         | G          |
| 6          | 32762309 | rs2051549  | G         | A          |
| 6          | 32768918 | rs9276606  | A         | T          |
| 6          | 32774091 | rs2621416  | T         | C          |
| 6          | 32795737 | rs2857151  | A         | G          |
| 6          | 32819259 | rs1894407  | C         | A          |
| 6          | 32830099 | rs241436   | A         | G          |
| 6          | 32836293 | rs241428   | T         | G          |
| 6          | 32842071 | rs9357155  | G         | A          |
| 6          | 32843852 | rs2071543  | G         | T          |
| 6          | 32945469 | rs1480380  | C         | T          |
| 6          | 32985503 | rs3097645  | G         | C          |
| 6          | 33004627 | rs3128935  | T         | C          |
| 6          | 33005822 | rs9276975  | C         | T          |
| 6          | 33007157 | rs378352   | G         | A          |
| 6          | 33007237 | rs399604   | T         | C          |
| 6          | 33080884 | rs1042151  | A         | G          |
| 6          | 33087084 | rs9277535  | A         | G          |
| 6          | 33087761 | rs9277554  | C         | T          |
| 6          | 33087828 | rs9277555  | G         | A          |
| 6          | 33102116 | rs3117242  | A         | G          |
| 6          | 33114531 | rs733208   | G         | A          |
| 6          | 33118472 | rs3117035  | C         | T          |
| 6          | 33118671 | rs1883414  | G         | A          |
| 6          | 33121846 | rs3117027  | C         | A          |
| 6          | 33129837 | rs3129269  | C         | A          |
| 6          | 33176171 | rs2254287  | C         | G          |
| 6          | 33236497 | rs9277952  | G         | A          |
| 6          | 65855460 | rs9354308  | G         | A          |
| 6          | 68275038 | rs10455657 | T         | G          |
| 7          | 40483    | rs6583337  | G         | A          |
| 8          | 1425554  | rs28680850 | G         | A          |
| 8          | 2021565  | rs6558578  | G         | T          |
| 8          | 2165853  | rs17685410 | A         | G          |
| 8          | 2229242  | rs4876199  | T         | G          |
| 9          | 88196267 | rs2814828  | T         | C          |

---

GWAS Hits that overlap with ASDPs

**Table S5: High-impact ASDPs not listed in dbSNP.** The table shows 10 ASDP-associated variants which were annotated in our in-house cohort with putative high impact. The **count** column contains the number of occurrences annotated as ASDP or not annotated. The **info** column offers various annotations separated by '|': gene symbol|RefSeqID|HGVS.cdna|HGVS.protein

| chrom | position  | ref | alt         | counts | scaffold   | info                                                         |
|-------|-----------|-----|-------------|--------|------------|--------------------------------------------------------------|
| chr2  | 131794984 | A   | AT          | 23/53  | KI270768.1 | HC2orf27B NM_214461.2 c.808dup p.(Ile270Asnfs*4)             |
| chr4  | 68646933  | T   | TC          | 49/119 | GL000257.2 | UGT2B15 NM_001076.3 c.1763dup p.(*588Trpext*11)              |
| chr6  | 30949435  | T   | C           | 17/121 | GL000250.2 | DPCR1 NM_080870.3 c.970T>C p.(*324Gln)                       |
| chr6  | 32828676  | C   | CCTCCACCCCA | 5/7    | GL000250.2 | TAP2 NM_000544.3 c.2290_2291insTGGGGTGGAG p.(Gly764Valfs*29) |
| chr15 | 30361719  | G   | A           | 1/32   | GL383554.1 | CHRFAM7A NM_139320.1 c.1813C>T p.(Gln605*)                   |
| chr15 | 32603707  | C   | T           | 1/65   | GL383554.1 | GOLGA8N NM_001282494.1 c.1810C>T p.(Gln604*)                 |
| chr17 | 37610127  | A   | AT          | 4/42   | KI270857.1 | DDX52 NM_001291476.1 16/16 c.5644dup p.(Ile1882Asnfs*3)      |
| chr19 | 54307242  | C   | CA          | 4/6    | GL949746.1 | LILRA5 NM_021250.3 c.1070dup p.(Leu357Phefs*40)              |
| chr19 | 54307242  | C   | CAA         | 2/3    | GL949746.1 | LILRA5 NM_021250.3 c.1069_1070dup p.(Leu357Phefs*2)          |
| chr22 | 23981036  | A   | G           | 4/11   | KI270879.1 | GSTT2 NR_126445.1 n.370+1A>G                                 |

---

**Algorithm S1** Determine candidate seed

---

**Input:** A candidate matching (M) block in a pairwise alignment  
SVMIN  $\leftarrow$  50 ▷ Minimum length of seed alignment  
seed\_len  $\leftarrow$  calculate\_length(M Block)  
ref\_start  $\leftarrow$  start\_position\_in\_reference\_sequence(M Block)  
alt\_start  $\leftarrow$  start\_position\_in\_alt\_hap\_sequence(M Block)  
**if** seed\_len \* 0.9 < SVMIN **then**  
    output **null**; ▷ skip this M block because it is too short  
**end if**  
CHOP  $\leftarrow$  floor(seed\_len \* 0.05) ▷ Length of sequence to be removed from both ends of the M Block  
**if** CHOP > SVMIN **then**  
    CHOP  $\leftarrow$  SVMIN ▷ Do not remove more than SVMIN residues  
**end if**  
ref\_start  $\leftarrow$  ref\_start + CHOP  
alt\_start  $\leftarrow$  alt\_start + CHOP  
seed\_len  $\leftarrow$  seed\_len - (2 \* CHOP)  
**Output:** Seed alignment starting at position **ref\_start** in the reference sequence and **alt\_start** in the alternate haplotype sequence, and having a length of **seed\_len** (Note that this block of the alignment has no gaps).

---



---

**Algorithm S2** ASDPex

---

**Input:** Region  $\mathcal{R}$ , list of ASDPs associated with  $\mathcal{R}$ , Sample genotype data  $\mathcal{G}$  (e.g., from VCF file)  
 $A \leftarrow$  Variants called in sample in region  $\mathcal{R}$   
 $B \leftarrow$  ASDPs in region  $\mathcal{R}$   
 $RV \leftarrow A \Delta B$  ▷ residual variants  
**if**  $|A| < |RV|$  **then**  
    haplotype inferred *homozygous REF*  
**else**  
     $hom \leftarrow$  count\_number\_of\_homozygous\_ASPD\_associated\_variants()  
     $N \leftarrow$  count\_total\_number\_of\_ASPD\_associated\_variants()  
    **if**  $hom/N > 0.9$  **then**  
        haplotype inferred *homozygous ALT*  
    **else**  
        haplotype inferred *heterozygous ALT*  
    **end if**  
**end if**  
**Output:** Inference on most likely genotype for region  $\mathcal{R}$  (homozygous REF, homozygous ALT scaffold, heterozygous). Mark appropriate variants as ASPD unless genotype called as homozygous REF.

---

## References

- <sup>1</sup> Gotoh, O.: An improved algorithm for matching biological sequences. J Mol Biol **162**(3), 705–708 (1982)
- <sup>2</sup> Brudno, M., Do, C.B., Cooper, G.M., Kim, M.F., Davydov, E., N.I.S.C.C.S.P., Green, E.D., Sidow, A., Batzoglou, S.: Lagan and multi-lagan: efficient tools for large-scale multiple alignment of genomic dna. Genome Res **13**(4), 721–731 (2003). doi:10.1101/gr.926603
- <sup>3</sup> Jäger, M., Wang, K., Bauer, S., Smedley, D., Krawitz, P., Robinson, P.N.: Jannovar: a java library for exome annotation. Hum Mutat **35**(5), 548–555 (2014). doi:10.1002/humu.22531
- <sup>4</sup> Eilbeck, K., Lewis, S.E.: Sequence ontology annotation guide. Comp Funct Genomics **5**(8), 642–647 (2004). doi:10.1002/cfg.446
